# Supplementary material for: A systematic review on functional electrical stimulation based rehabilitation systems for upper limb post-stroke recovery
Source: Frontiers journal article supplement (doi:10.3389/fneur.2023.1272992), 2023-12-08
Supplement: Data_Sheet_2.PDF [file Data_Sheet_2.PDF]

Table ST1: Quality assessment of case series studies using NIH tool.

| Study ID                             | NIH Quality Assessment Tool for Observational Case Series Studies |                                                                                       |                                |                                  |                                            |                                                                                                                            |                                          |                                                 |                                     | Overall quality |
|--------------------------------------|-------------------------------------------------------------------|---------------------------------------------------------------------------------------|--------------------------------|----------------------------------|--------------------------------------------|----------------------------------------------------------------------------------------------------------------------------|------------------------------------------|-------------------------------------------------|-------------------------------------|-----------------|
|                                      | 9. Was the study question or objective clearly stated?            | 2. Was the study population clearly and fully described, including a case definition? | 3. Were the cases consecutive? | 4. Were the subjects comparable? | 5. Was the intervention clearly described? | 6. Were the outcome measures clearly defined, valid, reliable, and implemented consistently across all study participants? | 7. Was the length of follow-up adequate? | 8. Were the statistical methods well-described? | 9. Were the results well-described? |                 |
| Makowski et al. (2014) [18]          | Yes                                                               | Yes                                                                                   | Yes                            | No                               | Yes                                        | Yes                                                                                                                        | Yes                                      | No                                              | Yes                                 | Fair            |
| Meadmore et al. (2014) [19]          | Yes                                                               | Yes                                                                                   | No                             | Yes                              | Yes                                        | Yes                                                                                                                        | Yes                                      | Yes                                             | Yes                                 | Good            |
| Sun et al. (2018) [20]               | Yes                                                               | Yes                                                                                   | No                             | No                               | Yes                                        | Yes                                                                                                                        | Yes                                      | No                                              | Yes                                 | Fair            |
| Niu et al. (2019) [21]               | Yes                                                               | Yes                                                                                   | Yes                            | No                               | Yes                                        | Yes                                                                                                                        | Yes                                      | No                                              | Yes                                 | Fair            |
| Chou et al. (2020) [22]              | Yes                                                               | Yes                                                                                   | Yes                            | Yes                              | Yes                                        | Yes                                                                                                                        | Yes                                      | No                                              | Yes                                 | Good            |
| Niu et al. (2022) [24]               | Yes                                                               | Yes                                                                                   | Yes                            | Yes                              | Yes                                        | Yes                                                                                                                        | Yes                                      | No                                              | Yes                                 | Good            |
| Irimia et al. (2017) [41]            | Yes                                                               | Yes                                                                                   | Yes                            | No                               | Yes                                        | Yes                                                                                                                        | Yes                                      | No                                              | Yes                                 | Fair            |
| Qiu et al. (2018) [43]               | Yes                                                               | Yes                                                                                   | Yes                            | No                               | Yes                                        | Yes                                                                                                                        | Yes                                      | Yes                                             | Yes                                 | Good            |
| SebastiánRomagosa et al. (2020) [44] | Yes                                                               | Yes                                                                                   | Yes                            | No                               | Yes                                        | Yes                                                                                                                        | Yes                                      | Yes                                             | Yes                                 | Good            |
| Choi et al. (2020) [45]              | Yes                                                               | Yes                                                                                   | Yes                            | No                               | Yes                                        | Yes                                                                                                                        | Yes                                      | Yes                                             | Yes                                 | Good            |
| Hara et al. (2013) [58]              | Yes                                                               | Yes                                                                                   | Yes                            | No                               | Yes                                        | Yes                                                                                                                        | Yes                                      | Yes                                             | Yes                                 | Good            |

Table ST2: Quality assessment of case reports using the Joanna Briggs Institute (JBI) Critical Appraisal tool

| Study ID                            | 1. Were patient’s demographic characteristics clearly described? | 2. Was the patient’s history clearly described and presented as a timeline? | 3. Was the current clinical condition of the patient on presentation clearly described? | 4. Were diagnostic tests or assessment methods and the results clearly described? | 5. Was the intervention(s) or treatment procedure(s) clearly described? | 6. Was the post-intervention clinical condition clearly described? | 7. Were adverse events (harms) or unanticipated events identified and described? | 8. Does the case report provide takeaway lessons? | Overall quality |
|-------------------------------------|------------------------------------------------------------------|-----------------------------------------------------------------------------|-----------------------------------------------------------------------------------------|-----------------------------------------------------------------------------------|-------------------------------------------------------------------------|--------------------------------------------------------------------|----------------------------------------------------------------------------------|---------------------------------------------------|-----------------|
| Martín Odriozola et al. (2021) [23] | Yes                                                              | Yes                                                                         | Yes                                                                                     | Yes                                                                               | Yes                                                                     | Yes                                                                | Yes                                                                              | Yes                                               | Good            |
| Daly et al. (2009) [37]             | Yes                                                              | Yes                                                                         | Yes                                                                                     | Yes                                                                               | Yes                                                                     | Yes                                                                | Yes                                                                              | Yes                                               | Good            |
| Mukaino et al. (2014) [38]          | Yes                                                              | Yes                                                                         | Yes                                                                                     | Yes                                                                               | Yes                                                                     | Yes                                                                | Yes                                                                              | Yes                                               | Good            |
| Sabathiel et al. (2016) [40]        | Yes                                                              | Yes                                                                         | Yes                                                                                     | Yes                                                                               | Yes                                                                     | Yes                                                                | Yes                                                                              | Yes                                               | Good            |
| Cho et al. (2017) [42]              | Yes                                                              | Yes                                                                         | Yes                                                                                     | Yes                                                                               | No                                                                      | Yes                                                                | Yes                                                                              | Yes                                               | Good            |
